# Supplementary material for: Microbial Community Analysis and Food Safety Practice Survey-Based Hazard Identification and Risk Assessment for Controlled Environment Hydroponic/Aquaponic Farming Systems
Source: Front Microbiol. 2022 May 19;13:879260. doi: 10.3389/fmicb.2022.879260 (PMC9161294; doi:10.3389/fmicb.2022.879260)
Supplement: Supplementary file 2 [file Table_2.XLSX]

## Sheet: Venn diagram overlapping ASVs
Fig. 10. a Microgreens and farm H environment
Overlapping Regions	# ASVs	Elements
HEnv HMic HNS LMic	36	ASV1654 ASV718 ASV1356 ASV700 ASV772 ASV677 ASV1517 ASV1420 ASV1358 ASV293 ASV1285 ASV783 ASV1364 ASV1158 ASV501 ASV1664 ASV1423 ASV1058 ASV765 ASV1330 ASV467 ASV1328 ASV605 ASV92 ASV1736 ASV1361 ASV1743 ASV1821 ASV721 ASV214 ASV192 ASV1746 ASV182 ASV574 ASV1014 ASV1275
HMic HNS LMic	4	ASV1138 ASV784 ASV1482 ASV840
HEnv HMic LMic	11	ASV775 ASV666 ASV348 ASV10 ASV1653 ASV186 ASV1348 ASV1025 ASV1665 ASV785 ASV614
HEnv HMic HNS	63	ASV1842 ASV1462 ASV485 ASV1397 ASV1723 ASV1448 ASV1487 ASV1758 ASV1672 ASV1378 ASV1406 ASV1745 ASV1059 ASV466 ASV1639 ASV242 ASV1868 ASV1744 ASV1808 ASV1437 ASV511 ASV1516 ASV1316 ASV333 ASV1725 ASV1785 ASV1624 ASV993 ASV1315 ASV1872 ASV1849 ASV1314 ASV1784 ASV1150 ASV1817 ASV1145 ASV1726 ASV1407 ASV1402 ASV255 ASV1637 ASV1137 ASV1372 ASV1401 ASV420 ASV1681 ASV1623 ASV1728 ASV1163 ASV1148 ASV1840…
HEnv HNS LMic	16	ASV1415 ASV79 ASV197 ASV1880 ASV364 ASV1024 ASV842 ASV1297 ASV51 ASV1217 ASV671 ASV1247 ASV367 ASV1484 ASV1085 ASV1112
HMic LMic	2	ASV176 ASV777
HMic HNS	7	ASV513 ASV1307 ASV1933 ASV1454 ASV639 ASV1779 ASV248
HEnv HMic	47	ASV1651 ASV1794 ASV1635 ASV1823 ASV1622 ASV1610 ASV1641 ASV1769 ASV1661 ASV1652 ASV1759 ASV1329 ASV638 ASV1768 ASV1807 ASV1756 ASV1792 ASV1612 ASV1751 ASV1650 ASV1611 ASV1290 ASV189 ASV228 ASV1646 ASV1749 ASV1766 ASV1810 ASV1752 ASV1790 ASV1765 ASV1727 ASV1764 ASV690 ASV1787 ASV1761 ASV1837 ASV1673 ASV1053 ASV1812 ASV1789 ASV1804 ASV1615 ASV1352 ASV316 ASV1609 ASV324
HNS LMic	7	ASV8 ASV1027 ASV380 ASV1767 ASV655 ASV12 ASV594
HEnv LMic	16	ASV1628 ASV1776 ASV1100 ASV187 ASV709 ASV819 ASV375 ASV1332 ASV1417 ASV1331 ASV1101 ASV4 ASV708 ASV621 ASV179 ASV1097
HEnv HNS	107	ASV1208 ASV550 ASV94 ASV76 ASV1177 ASV1121 ASV120 ASV724 ASV1908 ASV480 ASV1381 ASV1181 ASV1438 ASV1858 ASV87 ASV1176 ASV297 ASV1447 ASV1442 ASV1907 ASV1507 ASV1885 ASV1306 ASV1338 ASV917 ASV206 ASV749 ASV280 ASV1088 ASV1400 ASV1879 ASV1527 ASV1388 ASV566 ASV1456 ASV1254 ASV525 ASV1691 ASV1878 ASV1304 ASV1230 ASV1357 ASV44 ASV99 ASV28 ASV1185 ASV77 ASV559 ASV1359 ASV764 ASV1129 ASV1690 ASV111 ASV…
HMic	18	ASV224 ASV1696 ASV1763 ASV1073 ASV1514 ASV583 ASV1351 ASV54 ASV201 ASV801 ASV1671 ASV1678 ASV1864 ASV1157 ASV195 ASV1797 ASV1312 ASV1791
LMic	24	ASV625 ASV1117 ASV1780 ASV752 ASV1116 ASV617 ASV607 ASV1220 ASV38 ASV582 ASV1418 ASV624 ASV579 ASV180 ASV17 ASV592 ASV606 ASV1221 ASV707 ASV1344 ASV14 ASV1343 ASV177 ASV1893
HNS	123	ASV1513 ASV1712 ASV1485 ASV1037 ASV405 ASV547 ASV1095 ASV223 ASV1123 ASV1229 ASV435 ASV519 ASV1029 ASV1270 ASV1518 ASV1108 ASV377 ASV23 ASV1910 ASV1714 ASV1263 ASV1926 ASV914 ASV1486 ASV1244 ASV572 ASV1478 ASV1056 ASV537 ASV551 ASV1572 ASV1446 ASV1170 ASV378 ASV1932 ASV548 ASV521 ASV1477 ASV1016 ASV1715 ASV30 ASV1238 ASV423 ASV1710 ASV867 ASV413 ASV52 ASV571 ASV489 ASV1495 ASV354 ASV1298 ASV1219 …
HEnv	139	ASV789 ASV154 ASV918 ASV231 ASV434 ASV1103 ASV670 ASV1350 ASV1533 ASV190 ASV1434 ASV557 ASV372 ASV238 ASV310 ASV93 ASV939 ASV1023 ASV831 ASV68 ASV1120 ASV70 ASV689 ASV318 ASV907 ASV109 ASV809 ASV766 ASV701 ASV216 ASV50 ASV309 ASV863 ASV1733 ASV320 ASV1333 ASV1843 ASV751 ASV1702 ASV334 ASV941 ASV695 ASV806 ASV916 ASV146 ASV1539 ASV152 ASV1250 ASV759 ASV202 ASV965 ASV346 ASV803 ASV930 ASV758 ASV757…
Fig. 10. b Microgreens and L1 environment
Overlapping Regions	# ASVs	Elements
HMic LMed LMic LNS	25	ASV1330 ASV1654 ASV1356 ASV1328 ASV92 ASV666 ASV348 ASV10 ASV1361 ASV1517 ASV1420 ASV1821 ASV1358 ASV192 ASV1746 ASV182 ASV186 ASV783 ASV1348 ASV1025 ASV574 ASV1664 ASV1423 ASV1014 ASV1058
HMic LMic LNS	8	ASV765 ASV467 ASV605 ASV1285 ASV614 ASV1364 ASV1665 ASV1275
HMic LMed LMic	11	ASV176 ASV1736 ASV1482 ASV677 ASV1653 ASV1743 ASV721 ASV214 ASV293 ASV1158 ASV501
HMic LMed LNS	8	ASV485 ASV1448 ASV1487 ASV1758 ASV1059 ASV1681 ASV1872 ASV1234
LMed LMic LNS	25	ASV1247 ASV671 ASV367 ASV12 ASV17 ASV8 ASV4 ASV79 ASV197 ASV1221 ASV187 ASV364 ASV1097 ASV1220 ASV842 ASV1344 ASV38 ASV1027 ASV375 ASV1332 ASV14 ASV51 ASV1217 ASV1112 ASV1343
HMic LMic	9	ASV1138 ASV718 ASV700 ASV784 ASV775 ASV777 ASV772 ASV840 ASV785
HMic LNS	5	ASV639 ASV242 ASV1316 ASV1053 ASV1283
HMic LMed	14	ASV1402 ASV1672 ASV1790 ASV1727 ASV1652 ASV1623 ASV511 ASV333 ASV1148 ASV1354 ASV1625 ASV993 ASV316 ASV1626
LMic LNS	6	ASV1117 ASV621 ASV1116 ASV1297 ASV1417 ASV1893
LMed LMic	12	ASV1628 ASV1776 ASV1780 ASV752 ASV1100 ASV1880 ASV617 ASV1085 ASV380 ASV1767 ASV177 ASV1331
LMed LNS	16	ASV1208 ASV43 ASV761 ASV1050 ASV1218 ASV7 ASV1252 ASV2 ASV315 ASV1699 ASV1219 ASV346 ASV11 ASV44 ASV1311 ASV1251
HMic	108	ASV224 ASV1651 ASV1842 ASV1817 ASV1462 ASV1794 ASV1646 ASV1145 ASV1749 ASV1397 ASV1766 ASV1696 ASV1723 ASV1726 ASV1407 ASV1763 ASV255 ASV1635 ASV1823 ASV513 ASV1378 ASV1307 ASV1622 ASV1406
		ASV1745 ASV1810 ASV1637 ASV1933 ASV1610 ASV1073 ASV466 ASV1752 ASV1639 ASV1765 ASV1514 ASV1641 ASV1769 ASV1137 ASV1661 ASV1764 ASV1372 ASV1401 ASV690 ASV1868 ASV583 ASV420 ASV1864 ASV1759
		ASV1787 ASV1351 ASV1744 ASV1808 ASV1779 ASV1437 ASV1761 ASV1837 ASV1728 ASV54 ASV1329 ASV201 ASV638
		ASV1516 ASV801 ASV1163 ASV1673 ASV1840 ASV1725 ASV1768 ASV1454 ASV1812 ASV1807 ASV1157
		ASV1756 ASV1789 ASV1804 ASV1785 ASV1792 ASV195 ASV1671 ASV1612 ASV1624 ASV1615 ASV1797 ASV1875 ASV1751 ASV1315 ASV1820 ASV1352 ASV1678 ASV1650 ASV1611 ASV516 ASV248 ASV1290 ASV1755 ASV1609
		ASV189 ASV1576 ASV1849 ASV1799 ASV1312 ASV228 ASV1721 ASV1314 ASV1791 ASV1784 ASV324 ASV1150
Fig. 10. c Microgreens and farm H shoes and hands
Overlapping Regions	# ASVs	Elements
HHand HMic HShoe LMic	9	ASV1654 ASV92 ASV348 ASV1653 ASV1743 ASV1420 ASV1821 ASV1664 ASV1423
HMic HShoe LMic	26	ASV765 ASV467 ASV700 ASV1328 ASV666 ASV1736 ASV677 ASV1361 ASV1517 ASV721 ASV214 ASV1358 ASV293 ASV1285 ASV1746 ASV614 ASV783 ASV1364 ASV1158 ASV1025 ASV501 ASV574 ASV1014 ASV785 ASV1058 ASV1275
HHand HMic LMic	1	ASV1665
HHand HMic HShoe	28	ASV1817 ASV1646 ASV1635 ASV1758 ASV1622 ASV1745 ASV1637 ASV1610 ASV1639 ASV1641 ASV1769 ASV1652 ASV1808 ASV1623 ASV1728 ASV511 ASV1804 ASV1625 ASV1792 ASV1624 ASV1615 ASV1875 ASV1872 ASV1611 ASV1609 ASV1799 ASV1626 ASV1314
HMic LMic	17	ASV1330 ASV1138 ASV718 ASV1356 ASV176 ASV784 ASV775 ASV777 ASV605 ASV772 ASV1482 ASV10 ASV840 ASV192 ASV182 ASV186 ASV1348
HShoe LMic	17	ASV1776 ASV1247 ASV671 ASV367 ASV1484 ASV1100 ASV79 ASV197 ASV621 ASV1880 ASV187 ASV1024 ASV1085 ASV819 ASV375 ASV1417 ASV1112
HMic HShoe	64	ASV1651 ASV1842 ASV1462 ASV1794 ASV1145 ASV485 ASV1749 ASV1397 ASV1766 ASV1723 ASV1726 ASV1448 ASV1407 ASV1402 ASV1823 ASV1672 ASV1378 ASV1406 ASV1059 ASV466 ASV1752 ASV1790 ASV1765 ASV1727 ASV1137 ASV1764 ASV1372 ASV242 ASV1868 ASV420 ASV1759 ASV1681 ASV1437 ASV1329 ASV1516 ASV333 ASV1148 ASV1163 ASV1673 ASV1840 ASV1725 ASV1768 ASV1053 ASV1812 ASV1756 ASV1789 ASV1785 ASV1283 ASV1354 ASV1612 ASV1…
HHand HMic	3	ASV1787 ASV1744 ASV1761
HHand HShoe	3	ASV1481 ASV428 ASV1311
LMic	46	ASV579 ASV1628 ASV625 ASV1415 ASV1117 ASV12 ASV180 ASV17 ASV1780 ASV8 ASV752 ASV592 ASV4 ASV708 ASV606 ASV1221 ASV707 ASV1116 ASV617 ASV179 ASV364 ASV607 ASV709 ASV1097 ASV1220 ASV842 ASV594 ASV1344 ASV38 ASV582 ASV1027 ASV1418 ASV1297 ASV380 ASV1767 ASV1332 ASV14 ASV624 ASV51 ASV1217 ASV1343 ASV177 ASV1331 ASV1101 ASV1893 ASV655
HMic	40	ASV224 ASV1696 ASV1763 ASV255 ASV1487 ASV513 ASV639 ASV1307 ASV1810 ASV1933 ASV1073 ASV1514 ASV1661 ASV1401 ASV690 ASV583 ASV1864 ASV1351 ASV1779 ASV1837 ASV54 ASV201 ASV638 ASV801 ASV1316 ASV1454 ASV1807 ASV1157 ASV195 ASV1671 ASV1797 ASV1678 ASV316 ASV248 ASV1290 ASV189 ASV1312 ASV228 ASV1791 ASV1234
HShoe	106	ASV1208 ASV1440 ASV154 ASV43 ASV562 ASV289 ASV94 ASV517 ASV76 ASV231 ASV1177 ASV434 ASV1335 ASV1537 ASV120 ASV1350 ASV394 ASV234 ASV1381 ASV238 ASV761 ASV310 ASV1023 ASV1438 ASV1496 ASV831 ASV886 ASV1858 ASV518 ASV68 ASV70 ASV1884 ASV275 ASV1257 ASV66 ASV1447 ASV1442 ASV1507 ASV1464 ASV1203 ASV1338 ASV206 ASV749 ASV476 ASV156 ASV309 ASV1733 ASV320 ASV1859 ASV1273 ASV1400 ASV1702 ASV334 ASV1879 AS…
HHand	2	ASV1750 ASV1230
Fig. 10. d Lettuce and Farm A environment
Overlapping Regions	# ASVs	Elements
AEnv ALet ANS GLet LLet	69	ASV485 ASV1397 ASV1121 ASV1487 ASV1059 ASV466 ASV1653 ASV197 ASV572 ASV56 ASV1517 ASV1306 ASV1420 ASV1170 ASV617 ASV1088 ASV1358 ASV511 ASV1285 ASV1316 ASV1691 ASV1454 ASV1027 ASV1175 ASV380 ASV783 ASV1364
		ASV1129 ASV1664 ASV1690 ASV1423 ASV1058 ASV655 ASV1131 ASV1150 ASV765 ASV43 ASV1247 ASV1407 ASV1402 ASV467 ASV1452 ASV394 ASV605 ASV92 ASV886 ASV454 ASV621 ASV1361 ASV1743 ASV840 ASV420 ASV1681 ASV1821 ASV721 ASV214 ASV509 ASV1085 ASV549 ASV1354 ASV1283 ASV1625 ASV182 ASV1739 ASV1311 ASV574 ASV1164 ASV1014 ASV1275
AEnv ALet GLet LLet	65	ASV625 ASV1654 ASV1861 ASV1448 ASV1029 ASV377 ASV1745 ASV1436 ASV1267 ASV677 ASV1639 ASV1858 ASV242 ASV1447 ASV1868 ASV653 ASV1024 ASV30 ASV201 ASV638 ASV293 ASV423 ASV1388 ASV1297 ASV1684 ASV624 ASV1158 ASV28
		ASV1025 ASV555 ASV501 ASV1359 ASV220 ASV421 ASV1138 ASV289 ASV1302 ASV255 ASV639 ASV234 ASV1066 ASV1890 ASV4 ASV1736 ASV595 ASV518 ASV1137 ASV1257 ASV411 ASV1273 ASV315 ASV257 ASV575 ASV1053 ASV1875 ASV744
		ASV602 ASV1224 ASV1083 ASV1609 ASV419 ASV26 ASV1893 ASV1234 ASV113
ALet ANS GLet LLet	2	ASV516 ASV1318
AEnv ALet ANS LLet	10	ASV224 ASV405 ASV120 ASV1450 ASV1263 ASV490 ASV871 ASV269 ASV1097 ASV927
AEnv ALet ANS GLet	46	ASV1208 ASV1853 ASV435 ASV1494 ASV1758 ASV1307 ASV1910 ASV1007 ASV79 ASV640 ASV1176 ASV1532 ASV537 ASV1338 ASV1572 ASV863 ASV1932 ASV548 ASV54 ASV1516 ASV1527 ASV571 ASV1167 ASV46 ASV1546 ASV1185 ASV1872 ASV51 ASV1260 ASV1314 ASV494 ASV1330 ASV1195 ASV1376 ASV1004 ASV1598 ASV1044 ASV1604 ASV1383 ASV316 ASV1576 ASV1626 ASV1523 ASV988 ASV1574 ASV381
AEnv ANS GLet LLet	4	ASV1499 ASV27 ASV1482 ASV1444
ALet GLet LLet	5	ASV1842 ASV533 ASV578 ASV614 ASV1141
AEnv ALet LLet	27	ASV596 ASV76 ASV1635 ASV1120 ASV1056 ASV583 ASV1446 ASV410 ASV622 ASV413 ASV346 ASV1498 ASV1357 ASV598 ASV111 ASV114 ASV593 ASV592 ASV130 ASV1203 ASV119 ASV1859 ASV594 ASV207 ASV1746 ASV241 ASV1112
ALet ANS LLet	3	ASV1891 ASV607 ASV440
AEnv ALet GLet	96	ASV1651 ASV1095 ASV832 ASV1533 ASV443 ASV1378 ASV47 ASV372 ASV752 ASV23 ASV1181 ASV1714 ASV1380 ASV21 ASV1885 ASV1808 ASV635 ASV280 ASV364 ASV1715 ASV990 ASV1033 ASV566 ASV536 ASV1254 ASV333 ASV842 ASV1495
		ASV354 ASV599 ASV35 ASV656 ASV1304 ASV819 ASV1624 ASV1230 ASV375 ASV1751 ASV44 ASV993 ASV1348 ASV764 ASV824 ASV1094 ASV967 ASV1217 ASV1849 ASV1541 ASV36 ASV972 ASV352 ASV1090 ASV367 ASV1202 ASV1212 ASV1190
		ASV1328 ASV1810 ASV827 ASV353 ASV567 ASV1496 ASV1544 ASV25 ASV1089 ASV711 ASV1372 ASV20 ASV1548 ASV611 ASV556 ASV1623 ASV1252 ASV1568 ASV1873 ASV125 ASV1240 ASV1931 ASV1558 ASV1215 ASV1699 ASV374 ASV368 ASV1682
		ASV979 ASV815 ASV1828 ASV1797 ASV1542 ASV995 ASV1874 ASV373 ASV1755 ASV1730 ASV554 ASV171
ALet ANS GLet	5	ASV1123 ASV1573 ASV1878 ASV458 ASV1360
AEnv ALet ANS	43	ASV223 ASV1074 ASV389 ASV1514 ASV826 ASV1005 ASV398 ASV926 ASV1570 ASV1075 ASV52 ASV173 ASV1767 ASV973 ASV898 ASV1678 ASV923 ASV729 ASV738 ASV172 ASV987 ASV925 ASV962 ASV1309 ASV55 ASV1464 ASV1578 ASV97 ASV922 ASV1310 ASV860 ASV105 ASV874 ASV1522 ASV900 ASV1930 ASV963 ASV960 ASV1581 ASV873 ASV924 ASV1047 ASV921
AEnv GLet LLet	17	ASV1443 ASV252 ASV1016 ASV1428 ASV1493 ASV379 ASV1918 ASV1588 ASV408 ASV1784 ASV1440 ASV1481 ASV407 ASV1484 ASV784 ASV1163 ASV1921
ANS GLet LLet	2	ASV1395 ASV417
AEnv ANS LLet	2	ASV187 ASV1422
AEnv ANS GLet	3	ASV544 ASV455 ASV1502
ALet LLet	12	ASV1117 ASV1057 ASV582 ASV1332 ASV579 ASV630 ASV1457 ASV606 ASV1036 ASV448 ASV1148 ASV529
ALet GLet	28	ASV719 ASV480 ASV557 ASV552 ASV551 ASV206 ASV133 ASV525 ASV22 ASV1665 ASV126 ASV1225 ASV1382 ASV1551 ASV553 ASV1718 ASV1790 ASV236 ASV1748 ASV275 ASV1884 ASV837 ASV1601 ASV1833 ASV1545 ASV192 ASV195 ASV1886
AEnv ALet	196	ASV704 ASV1 ASV584 ASV1037 ASV740 ASV1264 ASV547 ASV144 ASV865 ASV1229 ASV1243 ASV641 ASV573 ASV918 ASV230 ASV937 ASV724 ASV929 ASV1908 ASV1672 ASV700 ASV1622 ASV1406 ASV616 ASV1381 ASV175 ASV895 ASV948 ASV666 ASV1610 ASV348 ASV310 ASV939 ASV258 ASV969 ASV831 ASV1641 ASV626 ASV742 ASV1244 ASV735 ASV1265 ASV1199 ASV297 ASV1076 ASV1652 ASV1200 ASV907 ASV615 ASV866 ASV809 ASV917 ASV308 ASV216 ASV192…
ALet ANS	10	ASV977 ASV1497 ASV812 ASV1466 ASV1340 ASV1165 ASV1458 ASV881 ASV1410 ASV1352
GLet LLet	16	ASV1776 ASV1278 ASV775 ASV1390 ASV1430 ASV1725 ASV1298 ASV1296 ASV210 ASV1362 ASV209 ASV1727 ASV1728 ASV1022 ASV229 ASV1662
AEnv LLet	6	ASV1628 ASV1712 ASV1356 ASV1401 ASV1432 ASV1747
ANS LLet	2	ASV1500 ASV1426
AEnv GLet	30	ASV642 ASV550 ASV1554 ASV176 ASV1926 ASV1933 ASV1214 ASV371 ASV1759 ASV1238 ASV1785 ASV1549 ASV1417 ASV1251 ASV1237 ASV1585 ASV1621 ASV1629 ASV491 ASV1335 ASV1916 ASV1589 ASV451 ASV493 ASV345 ASV492 ASV1731 ASV265 ASV1491 ASV663
ANS GLet	4	ASV470 ASV1663 ASV1597 ASV664
AEnv ANS	18	ASV545 ASV1270 ASV1508 ASV1825 ASV1479 ASV1255 ASV1675 ASV1515 ASV1511 ASV870 ASV343 ASV1519 ASV390 ASV384 ASV403 ASV383 ASV382 ASV1674
ALet	78	ASV957 ASV718 ASV961 ASV1177 ASV1823 ASV875 ASV519 ASV166 ASV190 ASV1189 ASV901 ASV1555 ASV294 ASV155 ASV68 ASV1661 ASV70 ASV1116 ASV689 ASV1860 ASV444 ASV1907 ASV378 ASV320 ASV1333 ASV521 ASV137 ASV235 ASV695 ASV1329 ASV1160 ASV299 ASV489 ASV361 ASV1807 ASV759 ASV1418 ASV302 ASV1476 ASV1599 ASV1315 ASV758 ASV757 ASV99 ASV244 ASV1571 ASV983 ASV189 ASV1139 ASV1142 ASV687 ASV278 ASV620 ASV1465 ASV1…
LLet	48	ASV1701 ASV1415 ASV1103 ASV1434 ASV1108 ASV1321 ASV530 ASV1100 ASV1023 ASV1486 ASV1280 ASV1050 ASV1322 ASV1892 ASV1456 ASV117 ASV432 ASV465 ASV1427 ASV1816 ASV1081 ASV251 ASV1391 ASV468 ASV613 ASV671 ASV1726 ASV1051 ASV430 ASV1501 ASV1232 ASV1706 ASV447 ASV290 ASV108 ASV438 ASV212 ASV1737 ASV1786 ASV1492 ASV1157 ASV250 ASV1147 ASV462 ASV1233 ASV233 ASV1054 ASV1433
GLet	30	ASV823 ASV1794 ASV495 ASV1596 ASV1763 ASV1236 ASV8 ASV1073 ASV1442 ASV580 ASV1658 ASV1656 ASV1856 ASV1219 ASV475 ASV1671 ASV581 ASV1659 ASV481 ASV180 ASV1919 ASV1668 ASV1657 ASV1669 ASV1864 ASV1837 ASV1783 ASV1915 ASV762 ASV1720
AEnv	112	ASV505 ASV789 ASV804 ASV734 ASV897 ASV693 ASV1525 ASV1696 ASV243 ASV697 ASV231 ASV434 ASV982 ASV966 ASV813 ASV773 ASV122 ASV238 ASV772 ASV75 ASV914 ASV1259 ASV1769 ASV1698 ASV725 ASV778 ASV691 ASV795 ASV1685 ASV766 ASV701 ASV1744 ASV1400 ASV816 ASV1702 ASV709 ASV906 ASV806 ASV146 ASV688 ASV774 ASV676 ASV311 ASV959 ASV1768 ASV168 ASV508 ASV1792 ASV844 ASV915 ASV225 ASV822 ASV705 ASV332 ASV1826 ASV…
ANS	15	ASV1513 ASV1350 ASV1518 ASV10 ASV1880 ASV1351 ASV186 ASV1560 ASV387 ASV1520 ASV386 ASV1469 ASV880 ASV1344 ASV1387
Fig. 10. e Lettuce and L2 environment
Overlapping Regions	# ASVs	Elements
ALet GLet LLet LNS	105	ASV625 ASV1654 ASV485 ASV1861 ASV1448 ASV1487 ASV1029 ASV377 ASV1745 ASV1436 ASV1059 ASV466 ASV1267 ASV197 ASV56 ASV242 ASV1447 ASV1517 ASV653 ASV1306 ASV1420 ASV617 ASV1088 ASV1024 ASV1358 ASV30 ASV201 ASV638
		ASV293 ASV511 ASV1388 ASV1285 ASV1316 ASV1691 ASV1454 ASV1027 ASV1297 ASV380 ASV1364 ASV624 ASV1158 ASV28 ASV1025 ASV501 ASV1359 ASV1129 ASV1664 ASV1690 ASV533 ASV1423 ASV1058 ASV1150 ASV1138 ASV289 ASV1302 ASV1407 ASV1402 ASV255 ASV467 ASV1452 ASV639 ASV394 ASV234 ASV605 ASV1066 ASV1890 ASV4 ASV1736 ASV454 ASV621 ASV518 ASV1361 ASV1743 ASV1257 ASV411 ASV840 ASV420 ASV1681 ASV1821 ASV721 ASV1273 …
		ASV575 ASV1085 ASV1053 ASV614 ASV1354 ASV1283 ASV1625 ASV182 ASV1875 ASV1739 ASV1311 ASV516 ASV574 ASV1164 ASV1083 ASV419 ASV26 ASV1014 ASV1318 ASV1141 ASV1275 ASV1234
ALet GLet LLet	36	ASV1842 ASV1397 ASV1121 ASV677 ASV1639 ASV1653 ASV1858 ASV572 ASV1868 ASV1170 ASV423 ASV1175 ASV783 ASV1684 ASV555 ASV220 ASV655 ASV1131 ASV765 ASV421 ASV43 ASV1247 ASV92 ASV886 ASV595 ASV578 ASV1137 ASV315 ASV257 ASV549 ASV744 ASV602 ASV1224 ASV1609 ASV1893 ASV113
ALet LLet LNS	29	ASV405 ASV1117 ASV120 ASV1450 ASV1057 ASV1263 ASV1891 ASV1056 ASV1446 ASV410 ASV1498 ASV1332 ASV1357 ASV111 ASV114 ASV592 ASV1457 ASV130 ASV1203 ASV119 ASV1859 ASV448 ASV440 ASV1097 ASV1148 ASV207 ASV1746 ASV529 ASV1112
ALet GLet LNS	23	ASV1208 ASV1758 ASV443 ASV1378 ASV1176 ASV280 ASV990 ASV1527 ASV44 ASV993 ASV1185 ASV51 ASV1217 ASV1314 ASV1541 ASV1328 ASV1884 ASV1044 ASV1886 ASV1576 ASV1730 ASV1626 ASV1574
GLet LLet LNS	24	ASV1278 ASV1499 ASV252 ASV1390 ASV1428 ASV1395 ASV1430 ASV1298 ASV1493 ASV27 ASV379 ASV1918 ASV408 ASV1362 ASV407 ASV1484 ASV1482 ASV1727 ASV1728 ASV1022 ASV1163 ASV417 ASV229 ASV1921
ALet LLet	23	ASV224 ASV596 ASV76 ASV1635 ASV1120 ASV583 ASV490 ASV607 ASV622 ASV413 ASV582 ASV346 ASV598 ASV871 ASV269 ASV593 ASV579 ASV630 ASV606 ASV1036 ASV594 ASV241 ASV927
ALet GLet	152	ASV1651 ASV1853 ASV1095 ASV832 ASV1123 ASV435 ASV1494 ASV719 ASV1533 ASV480 ASV557 ASV1307 ASV47 ASV372 ASV752 ASV1910 ASV23 ASV1181 ASV1714 ASV1007 ASV79 ASV1380 ASV552 ASV640 ASV21 ASV1573 ASV1532 ASV537
		ASV1885 ASV1338 ASV551 ASV206 ASV133 ASV1572 ASV1808 ASV863 ASV635 ASV1932 ASV548 ASV364 ASV1715 ASV1033 ASV54 ASV1516 ASV566 ASV536 ASV1254 ASV333 ASV842 ASV571 ASV1167 ASV525 ASV22 ASV1878 ASV1495 ASV354
		ASV599 ASV35 ASV656 ASV46 ASV1304 ASV819 ASV1624 ASV1230 ASV375 ASV1751 ASV1348 ASV1546 ASV1872 ASV1665 ASV764 ASV824 ASV1094 ASV967 ASV1260 ASV1849 ASV36 ASV972 ASV126 ASV494 ASV1330 ASV352 ASV1090 ASV367 ASV1225 ASV1382 ASV1195 ASV1376 ASV1202 ASV1004 ASV1212 ASV1190 ASV1551 ASV553 ASV1810 ASV1718 ASV827 ASV353 ASV1790 ASV236 ASV567 ASV1496 ASV1544 ASV1748 ASV1598 ASV458 ASV25 ASV1089 ASV711 AS…
ALet LNS	23	ASV1264 ASV957 ASV1177 ASV1672 ASV1622 ASV666 ASV348 ASV1514 ASV1116 ASV833 ASV1497 ASV1075 ASV1767 ASV277 ASV758 ASV923 ASV949 ASV1764 ASV1673 ASV830 ASV1820 ASV563 ASV989
GLet LLet	15	ASV1776 ASV1443 ASV775 ASV1016 ASV1725 ASV1296 ASV210 ASV1588 ASV1784 ASV1440 ASV1481 ASV784 ASV209 ASV1444 ASV1662
LLet LNS	44	ASV1701 ASV1415 ASV1356 ASV1434 ASV1108 ASV1321 ASV530 ASV1500 ASV1023 ASV1486 ASV187 ASV1280 ASV1050 ASV1322 ASV1892 ASV1456 ASV117 ASV432 ASV465 ASV1427 ASV1816 ASV1081 ASV251 ASV1391 ASV468 ASV613 ASV1051
		ASV430 ASV1501 ASV1706 ASV447 ASV290 ASV438 ASV1401 ASV1737 ASV1492 ASV1157 ASV1432 ASV250 ASV462 ASV1747 ASV1054 ASV1426 ASV1433
GLet LNS	4	ASV1663 ASV1585 ASV1916 ASV1502
ALet	304	ASV704 ASV1 ASV584 ASV1037 ASV740 ASV547 ASV718 ASV144 ASV865 ASV961 ASV223 ASV1229 ASV1243 ASV641 ASV573 ASV918 ASV230 ASV1823 ASV875 ASV519 ASV937 ASV166 ASV724 ASV929 ASV190 ASV1908 ASV1189 ASV700 ASV901 ASV1555 ASV1406 ASV616 ASV1381 ASV1074 ASV175 ASV895 ASV948 ASV1610 ASV310 ASV939 ASV258 ASV969 ASV831 ASV389 ASV294 ASV155 ASV826 ASV1641 ASV626 ASV742 ASV1244 ASV735 ASV1265 ASV68 ASV1199 AS…
LLet	14	ASV1628 ASV1712 ASV1103 ASV1100 ASV671 ASV1726 ASV1422 ASV1232 ASV108 ASV212 ASV1786 ASV1147 ASV1233 ASV233
GLet	63	ASV642 ASV550 ASV823 ASV1554 ASV1794 ASV495 ASV470 ASV1596 ASV1763 ASV1236 ASV8 ASV1597 ASV176 ASV1926 ASV1933 ASV1073 ASV1214 ASV371 ASV1442 ASV1759 ASV580 ASV1238 ASV1658 ASV1656 ASV1856 ASV1219 ASV1785 ASV475 ASV1671 ASV1549 ASV1417 ASV581 ASV1659 ASV1251 ASV1237 ASV481 ASV1621 ASV1629 ASV544 ASV491 ASV180 ASV1919 ASV1335 ASV1668 ASV1589 ASV664 ASV451 ASV1657 ASV1669 ASV455 ASV1864 ASV493 ASV1…
LNS	12	ASV1485 ASV1350 ASV1425 ASV1880 ASV1702 ASV1255 ASV1107 ASV1268 ASV1704 ASV1469 ASV118 ASV1729
Fig. 10. f Lettuce and Farm A shoes
Overlapping Regions	# ASVs	Elements
ALett AShoe GLett LLett	94	ASV1654 ASV485 ASV1397 ASV1448 ASV1121 ASV1487 ASV1745 ASV1059 ASV466 ASV1267 ASV677 ASV1639 ASV1653 ASV197 ASV1858 ASV572 ASV242 ASV1868 ASV1517 ASV1306 ASV1420 ASV1170 ASV1088 ASV1024 ASV1358 ASV201 ASV638 ASV293 ASV1285 ASV1316 ASV1027 ASV1175 ASV1297 ASV380 ASV783 ASV1364 ASV1684 ASV28 ASV1158 ASV555 ASV501 ASV1359 ASV1129 ASV1664 ASV1690 ASV1423 ASV1058 ASV1131 ASV1150 ASV765 ASV43 ASV1138 A…
ALett AShoe LLett	20	ASV1635 ASV120 ASV1263 ASV1120 ASV1056 ASV583 ASV1446 ASV622 ASV413 ASV346 ASV111 ASV871 ASV269 ASV130 ASV1203 ASV1097 ASV1746 ASV241 ASV927 ASV1112
ALett GLett LLett	47	ASV1842 ASV625 ASV1861 ASV1029 ASV377 ASV1436 ASV56 ASV1447 ASV653 ASV617 ASV30 ASV423 ASV511 ASV1388 ASV1691 ASV1454 ASV624 ASV1025 ASV533 ASV220 ASV655 ASV421 ASV1302 ASV639 ASV605 ASV1890 ASV595 ASV578 ASV454 ASV518 ASV1361 ASV1137 ASV411 ASV420 ASV1273 ASV509 ASV575 ASV1053 ASV614 ASV516 ASV574 ASV419 ASV1318 ASV1141 ASV1893 ASV1234 ASV113
AShoe GLett LLett	9	ASV1499 ASV252 ASV1428 ASV27 ASV1588 ASV1784 ASV407 ASV784 ASV1444
ALett AShoe GLett	101	ASV1651 ASV1208 ASV1853 ASV1095 ASV832 ASV1494 ASV1758 ASV1533 ASV1378 ASV47 ASV372 ASV752 ASV1910 ASV23 ASV1181 ASV1714 ASV1007 ASV79 ASV1176 ASV537 ASV1338 ASV1808 ASV863 ASV364 ASV1715 ASV990 ASV1033 ASV1527 ASV566 ASV536 ASV1254 ASV333 ASV842 ASV571 ASV354 ASV35 ASV46 ASV819 ASV1624 ASV1230 ASV375 ASV1751 ASV44 ASV1348 ASV1546 ASV1185 ASV1872 ASV764 ASV824 ASV51 ASV1094 ASV967 ASV1260 ASV1217…
ALett LLett	32	ASV224 ASV596 ASV405 ASV1117 ASV76 ASV1450 ASV1057 ASV1891 ASV490 ASV410 ASV607 ASV582 ASV1498 ASV1332 ASV1357 ASV598 ASV114 ASV593 ASV579 ASV630 ASV592 ASV1457 ASV606 ASV1036 ASV119 ASV1859 ASV448 ASV440 ASV1148 ASV594 ASV207 ASV529
AShoe LLett	4	ASV1628 ASV1356 ASV1422 ASV1747
GLett LLett	30	ASV1776 ASV1443 ASV1278 ASV775 ASV1390 ASV1016 ASV1395 ASV1430 ASV1725 ASV1298 ASV1493 ASV379 ASV1296 ASV1918 ASV210 ASV408 ASV1440 ASV1362 ASV1481 ASV1484 ASV209 ASV1482 ASV1727 ASV1728 ASV1022 ASV1163 ASV417 ASV229 ASV1921 ASV1662
ALett AShoe	153	ASV704 ASV1 ASV584 ASV740 ASV144 ASV865 ASV573 ASV918 ASV230 ASV937 ASV724 ASV1672 ASV700 ASV1622 ASV1406 ASV1381 ASV175 ASV895 ASV948 ASV666 ASV1610 ASV348 ASV310 ASV939 ASV258 ASV969 ASV831 ASV1514 ASV826 ASV1641 ASV742 ASV735 ASV1265 ASV297 ASV1076 ASV1652 ASV1200 ASV907 ASV866 ASV809 ASV917 ASV309 ASV1733 ASV350 ASV926 ASV833 ASV751 ASV334 ASV941 ASV916 ASV801 ASV716 ASV867 ASV814 ASV793 ASV1…
ALett GLett	74	ASV1123 ASV435 ASV719 ASV443 ASV480 ASV557 ASV1307 ASV1380 ASV552 ASV640 ASV21 ASV1573 ASV1532 ASV1885 ASV551 ASV206 ASV133 ASV1572 ASV635 ASV1932 ASV548 ASV280 ASV54 ASV1516 ASV1167 ASV525 ASV22 ASV1878 ASV1495 ASV599 ASV656 ASV1304 ASV993 ASV1665 ASV126 ASV494 ASV1225 ASV1382 ASV1195 ASV1004 ASV1190 ASV1551 ASV553 ASV1718 ASV1790 ASV236 ASV1544 ASV1748 ASV458 ASV25 ASV1372 ASV1884 ASV275 ASV20 …
AShoe GLett	19	ASV550 ASV1554 ASV176 ASV371 ASV1759 ASV1785 ASV1549 ASV1417 ASV1585 ASV1621 ASV1629 ASV1589 ASV451 ASV455 ASV345 ASV1731 ASV265 ASV663 ASV1502
LLett	54	ASV1712 ASV1701 ASV1415 ASV1103 ASV1434 ASV1108 ASV1321 ASV530 ASV1100 ASV1500 ASV1023 ASV1486 ASV187 ASV1280 ASV1050 ASV1322 ASV1892 ASV1456 ASV117 ASV432 ASV465 ASV1427 ASV1816 ASV1081 ASV251 ASV1391 ASV468 ASV613 ASV671 ASV1726 ASV1051 ASV430 ASV1501 ASV1232 ASV1706 ASV447 ASV290 ASV108 ASV438 ASV212 ASV1401 ASV1737 ASV1786 ASV1492 ASV1157 ASV1432 ASV250 ASV1147 ASV462 ASV1233 ASV233 ASV1054 A…
ALett	174	ASV1037 ASV1264 ASV547 ASV957 ASV718 ASV961 ASV223 ASV1229 ASV1243 ASV641 ASV1177 ASV1823 ASV875 ASV519 ASV166 ASV929 ASV190 ASV1908 ASV1189 ASV901 ASV1555 ASV616 ASV1074 ASV389 ASV294 ASV155 ASV626 ASV1244 ASV68 ASV1199 ASV1661 ASV70 ASV1116 ASV689 ASV1860 ASV444 ASV1907 ASV615 ASV308 ASV216 ASV378 ASV1927 ASV1005 ASV977 ASV320 ASV398 ASV1333 ASV521 ASV137 ASV235 ASV695 ASV1329 ASV1497 ASV1570 A…
AShoe	103	ASV789 ASV804 ASV734 ASV897 ASV693 ASV1525 ASV1696 ASV243 ASV697 ASV982 ASV434 ASV966 ASV813 ASV773 ASV122 ASV1508 ASV238 ASV772 ASV75 ASV914 ASV1259 ASV1769 ASV1698 ASV725 ASV778 ASV691 ASV795 ASV1685 ASV766 ASV701 ASV1744 ASV1400 ASV816 ASV709 ASV906 ASV806 ASV146 ASV688 ASV774 ASV676 ASV311 ASV959 ASV1768 ASV168 ASV1792 ASV844 ASV915 ASV225 ASV822 ASV705 ASV332 ASV835 ASV876 ASV441 ASV931 ASV1…
GLett	48	ASV642 ASV823 ASV1794 ASV495 ASV470 ASV1596 ASV1663 ASV1763 ASV1236 ASV8 ASV1597 ASV1926 ASV1933 ASV1073 ASV1214 ASV1442 ASV580 ASV1238 ASV1658 ASV1656 ASV1856 ASV1219 ASV475 ASV1671 ASV581 ASV1659 ASV1251 ASV1237 ASV481 ASV544 ASV491 ASV180 ASV1919 ASV1335 ASV1916 ASV1668 ASV664 ASV1657 ASV1669 ASV1864 ASV493 ASV1837 ASV1783 ASV492 ASV1491 ASV1915 ASV762 ASV1720
